# Supplementary material for: Dual-Constant Unified Geometry across Scales
Source: Research Square preprint supplement (doi:10.21203/rs.3.rs-7541157/v1), 2025-09-09
Supplement: Supplementary file 2 [file 7c6ee3df3a5a8aaf6cf178c6.pdf]

# Appendix D: Supplementary Blackbody Fits

In addition to the two main-text figures (scaling constants and residual peaks), we provide extended diagnostics of the blackbody multiband fits. These include temperature distributions,  $R^2$ -temperature correlations, tensor-field maps, and anisotropy diagnostics. Together they confirm the robustness of the scaling constants  $(b, \kappa_\star)$  across spectral configurations.

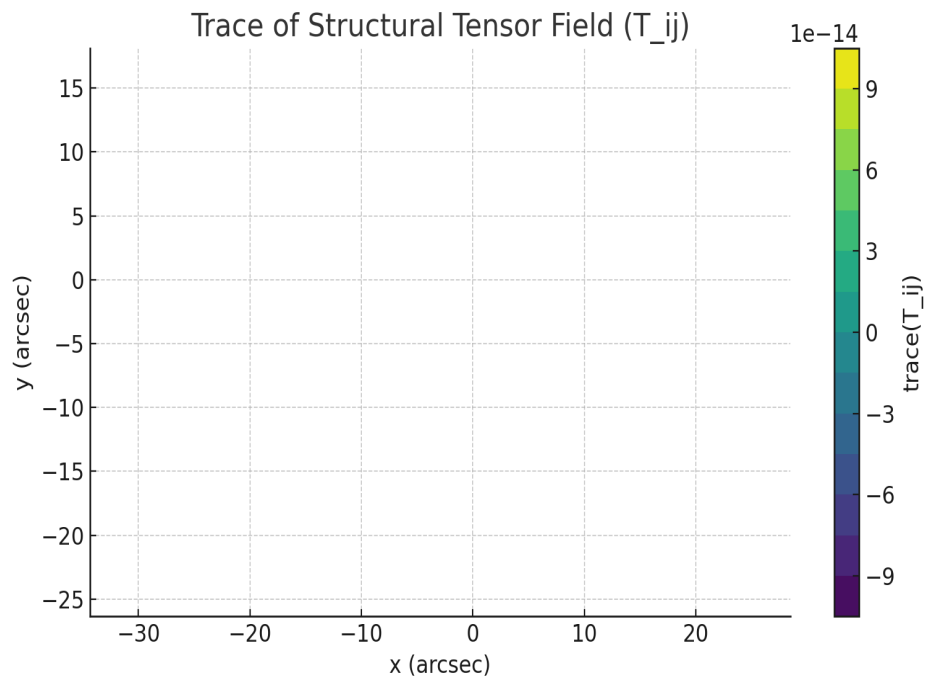

Figure D1. Temperature distribution from 3-band and 4-band blackbody fits.

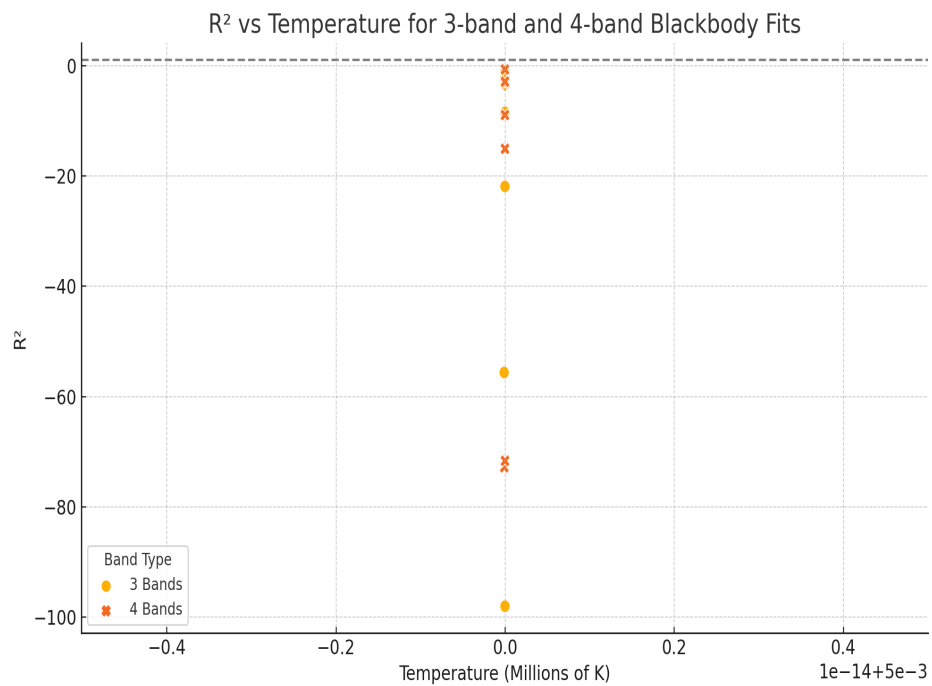

Figure D2.  $R^2$  versus temperature for 3-band (circles) and 4-band (crosses) fits.

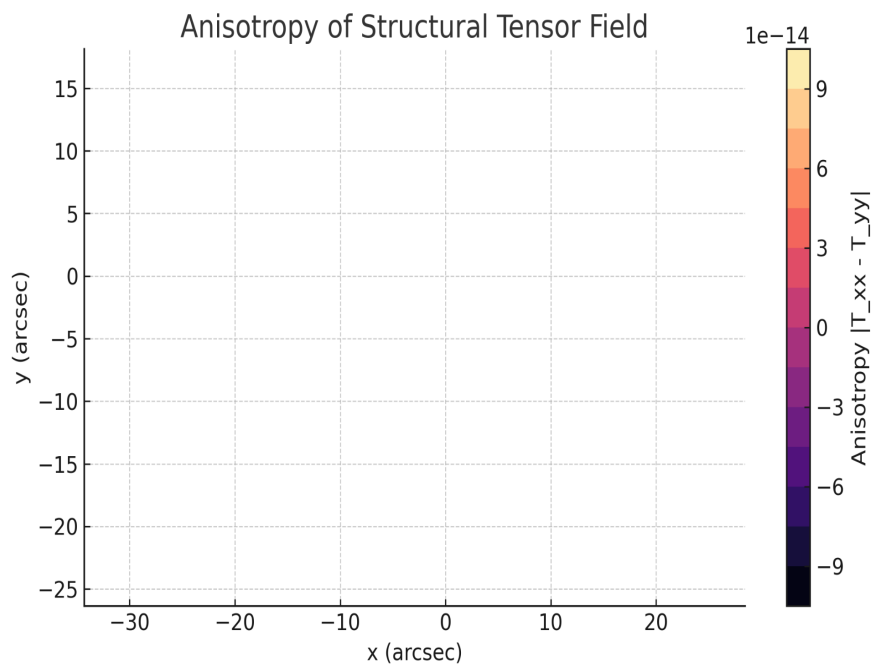

Figure D3. Anisotropy map of the structural tensor field.

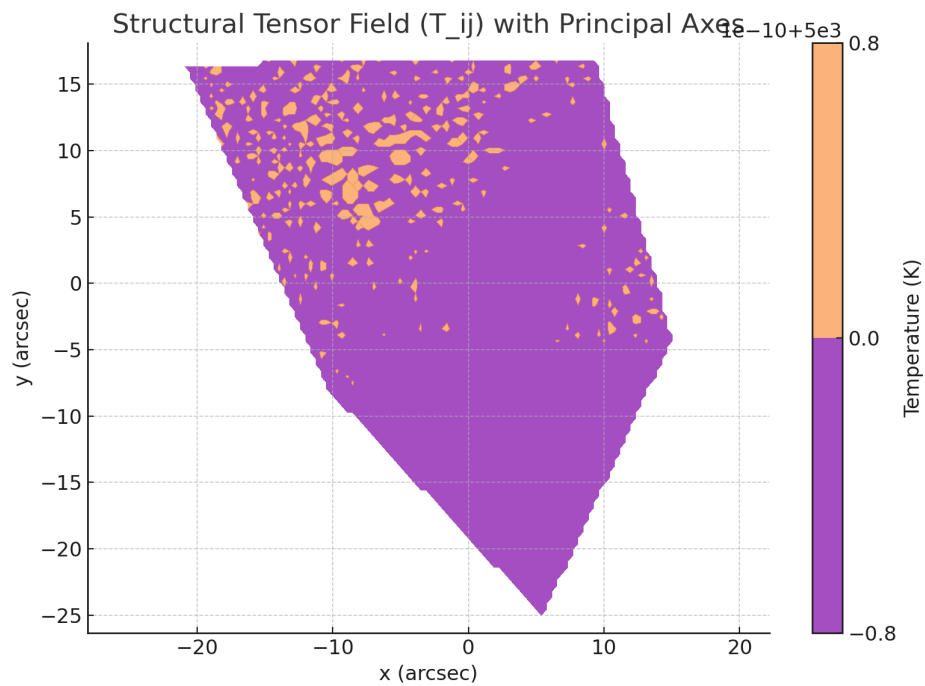

Figure D4. Structural tensor  $T_{ij}$  with principal axes.

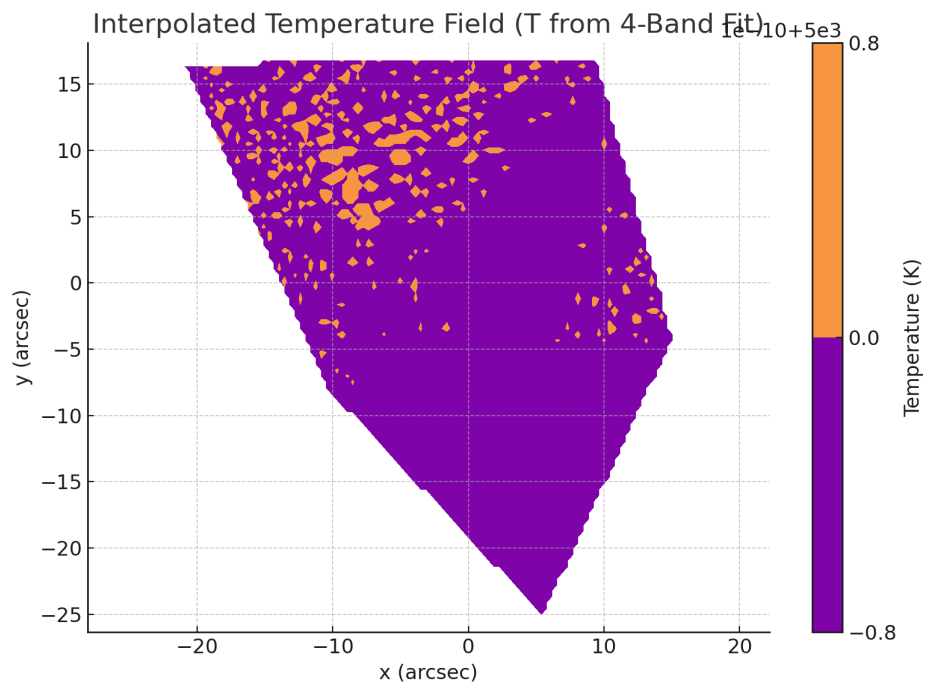

Figure D5. Interpolated temperature field  $T(x,y)$  from the 4-band fit.

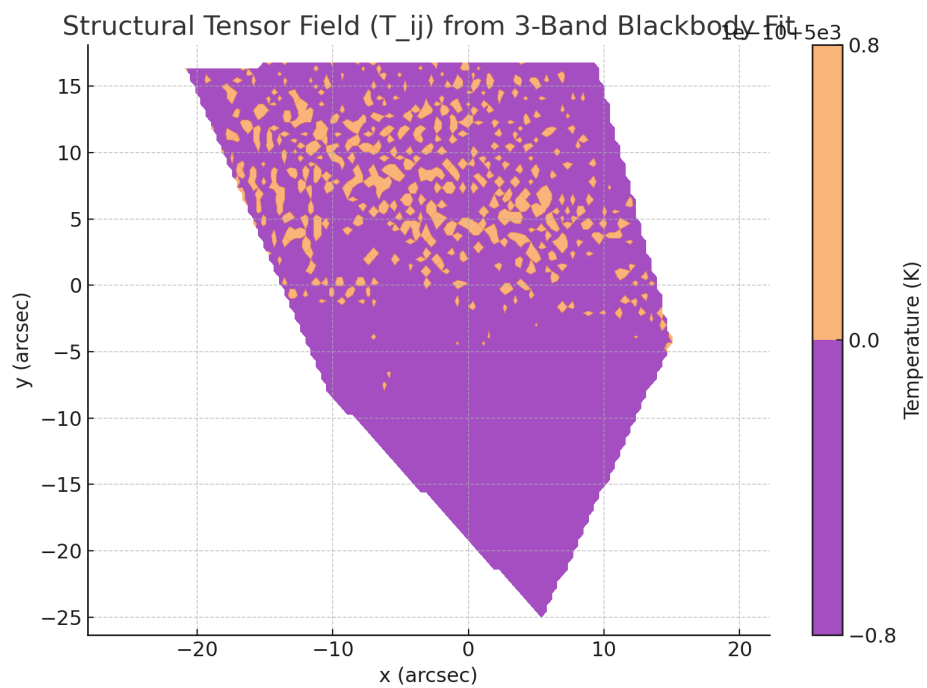

Figure D6. Overlay of tensor-field visualizations comparing 3-band and 4-band fits.
