# Supplementary material for: Dual-Constant Unified Geometry across Scales
Source: Research Square preprint supplement (doi:10.21203/rs.3.rs-7541157/v1), 2025-09-09
Supplement: Supplementary file 3 [file ccf89fbe3589fe701564db9e.pdf]

# Supplement file: Supplementary Note S2: Why two constants suffice across scales

September 4, 2025

## 1 Supplementary Note S2: Why two constants suffice across scales

### 1. Physical invariances

Two fundamental invariances reduce the structural description to only two constants.

**(A) Mass/flux conservation.** In the transition region ( $x \approx r_0$ ), define the dimensionless coordinate  $y = x/r_0$ . The effective transition width is  $\Delta y \sim 1/\alpha$ , hence the physical width  $\Delta x \sim r_0/\alpha$ . The “contrast mass” or structural flux in this region,

$$\Delta M \sim \int_{r_0 - \Delta x/2}^{r_0 + \Delta x/2} 4\pi r^2 \rho(r) dr \approx 4\pi r_0^2 \rho_{\text{tr}} \Delta x,$$

remains in a stable domain under continuity constraints. Since  $\Delta x \sim r_0/\alpha$ , one finds

$$\Delta M \propto \frac{\rho_{\text{tr}}}{\alpha} r_0^3.$$

Meanwhile, the physical slope  $S_{\text{phys}} \equiv \left| \frac{dU}{dx} \right|_{x \approx r_0} \propto \alpha/r_0$  is observed to remain stable across systems. Thus we conclude

$$\boxed{\alpha \propto r_0}$$

as the first universal relation.

**(B) Action-phase invariance.** The characteristic time is  $\tau \sim r_0/c$ , with energy scale  $E_0$ . Requiring the action-phase jump  $\Delta\phi$  across the transition to remain in the same equivalence class  $\mathcal{O}(1)$  gives

$$\Delta\phi \sim \frac{E_0 \tau}{\hbar} \sim \frac{E_0 r_0}{\hbar c} \approx \mathcal{O}(1),$$

hence

$$\boxed{E_0 r_0 \approx \hbar c} \quad (b = 1).$$

### 2. Mathematical structure

**Proposition 1 (Shape-family reduction).** The canonical MEST solutions (MEST-2, MEST-2n, MEST-n2), under smoothness and finite-curvature boundary conditions, are homeomorphic to a universal class of smooth transition kernels (tanh/logistic/arctan). Thus any observable profile can be written as

$$U(x) = U_\infty \mathcal{F}\left(\frac{x - r_0}{r_0/\alpha}\right),$$

with a single dimensionless shape parameter  $\alpha$  and one scale parameter  $r_0$ .

**Proposition 2 (Dual mapping).** Relativistic correspondence maps  $r_0 \mapsto \tau = r_0/c$  and  $E_0$ , constrained by phase invariance. Hence

$$(\alpha, r_0) \longleftrightarrow (\alpha, E_0), \quad E_0 r_0 \approx \hbar c.$$

### 3. Statistical support

- **Model comparison:** Two-parameter fits already minimize AIC/BIC; adding parameters yields negligible or negative improvement.
- **Hierarchical Bayes:** Posteriors of  $\alpha$  overlap strongly across systems, supporting universality.
- **Cross-validation:** Hold-out and LOO errors remain stable, showing robustness of the dual-constant law.

#### 4. Falsifiability and predictivity

- Any systematic deviation from slope  $b = 1$  in  $\log E_0$  vs.  $\log r_0$ , or breakdown of  $\alpha/r_0$  stability, would falsify the law.
- Given either  $r_0$  or  $E_0$ , the other is directly predicted with no extra freedom.

#### 5. Conclusion

Through conservation and action-phase invariances, MEST equations reduce structural fits across galaxies, lensing, CMB, and scattering data to two universal constants: the scaling law  $\alpha \propto r_0$  and the power-law duality  $E_0 r_0 \approx \hbar c$ . These invariants persist across more than twenty orders of magnitude, demonstrating that two constants suffice to unify micro- and macro-scale phenomena.
